# Supplementary material
Source: Research Square preprint supplement (doi:10.21203/rs.3.rs-9654509/v1)
Supplement: Supplementary file 1 [file 656bb8ec4e627f5d550edd43.docx]

# Appendix A

Representative Interview Excerpts

| **Open Coding** | **Excerpts from Interviews** |
| --- | --- |
| Convenient geographic location and transportation | “If visiting the museum had not already been part of our plan, its location in a rural area would actually have made it quite difficult to access. When we went there, we first had to take a taxi to the roadside, and then someone came to pick us up on a small three-wheeled vehicle to take us the rest of the way in. It felt rather inconvenient.” |
| Clear and prominent entrance signage | “The entrance to this museum was relatively hidden, and there was no particularly prominent signage. Although its location was clear on the map, we still spent some time finding it once we arrived, because most of the routes leading to the museum were narrow side streets rather than clearly identifiable main roads.” |
| Explicit information and convenient booking process | “There are actually many museums in the area, with the Shaanxi History Museum being the most well-known. However, its tickets are often difficult to reserve and visitor crowds are usually very large. As a result, I tended to prefer visiting some relatively niche small museums, where the booking process was much more convenient and the overall experience felt less crowded.” |
| Clear and explicit visitor guidance | “I think the most fundamental aspect is having a clear narrative line to guide visitors throughout the experience. Whether it is the circulation route, the exhibition narrative, or the relationships between exhibits, visitors should be able to understand where to go next and what the exhibition as a whole is trying to convey. In addition, supportive guidance information is also important, particularly in helping visitors navigate key points and transitions throughout the overall visiting process.” |
| Reasonable pricing with good value | “I think ticket pricing is quite important, at least it should not be too expensive. For young visitors, a more reasonable price makes them more willing to enter and explore the museum, and also gives them a stronger sense that the overall experience is worth the cost.” |
| Visually refined exhibitions aligned with contemporary trends | “I think a museum first needs to offer content that is genuinely worth experiencing. If it regularly updates its exhibits or introduces new themes—for example, a new art exhibition or changes in the mode of display—I would be willing to visit again.” |
| Professional and distinctive displays | “Compared with large museums that mainly display representative artefacts, smaller museums often provide more in-depth interpretations around specific themes, making them more suitable for visitors who genuinely want to explore the content further. I feel that they usually offer greater professionalism and depth. At the same time, niche museums also need distinctive characteristics—something that sets them apart from others—so that people are willing to make a special trip to visit and even return again.” |
| Immersive exhibition space with aesthetic appeal and atmosphere | “I decided to visit this museum after seeing it recommended on the Chinese social media platform Xiaohongshu. The ticket also included several items, such as drinks, snacks, and souvenirs related to the museum. If you took part in the on-site interactive activities and completed the tasks, you could also receive additional commemorative items, which made the experience feel quite interesting.” |
| Well-planned and comfortable space | “I think efficient use of space is quite important. For example, some interactive areas should allow several visitors to participate and engage simultaneously, rather than having one person occupy the experience for too long. Especially during crowded periods, if a single interactive activity takes too much time, it can easily create congestion and negatively affect the overall visiting experience.” |
| On-site crowd management and safety assurance | “At that time, several classes of students entered the museum together, making the space suddenly very crowded. Many people were running around and pushing through the exhibition areas, which affected others’ visiting experience. Personally, I wanted to slow down and carefully read the exhibits and texts, but the chaotic environment made it difficult to truly immerse myself in the visit.” |
| Professional and in-depth content | “Its interpretive approach was essentially just reading aloud the information already written on the object labels, without offering much additional explanation. What I had hoped for was that, when arriving at each artefact, it would feel as though a guide were there to explain in detail its history and background, but in practice it did not create that kind of experience.” |
| Novel and distinctive content | “Some museums have relatively monotonous exhibition formats, mainly consisting of artefacts accompanied by text descriptions, which can feel repetitive throughout the visit. In contrast, I am more attracted to content with distinctive local characteristics or niche cultural elements, especially things that are rarely seen elsewhere. In addition, the overall atmosphere of the space also encourages visitors to take photos and spend more time engaging with the experience.” |
| Abundant and engaging content | “Some places create a kind of ‘museum cluster’ experience, somewhat similar to the integrated atmosphere of a theme park. Within the same area, there may be different types of small museums, such as anti-war museums or furniture museums, many of which are privately operated. This kind of arrangement makes the content feel richer and more engaging, encouraging visitors to spend more time exploring continuously.” |
| Continuously maintained and updated content | “I think museums need to continuously update their content, such as exhibition formats, interpretive texts, or thematic narratives, rather than simply keeping the artefacts unchanged. New art exhibitions, special thematic displays, or periodic content updates can make visitors feel that the museum always offers something worth returning to experience.” |
| Interesting and easy-to-understand explanations | “I think interpretive methods should be more dynamic, or incorporate more interactive elements. In this way, they can better highlight the value of on-site viewing and in-person experience, while also preventing the visit from feeling too monotonous and making visitors more willing to continue engaging with the exhibition.” |
| Personalized and diverse interpretation methods | “I would prefer the visiting experience to feel more self-directed. For example, when I come across an exhibit that suddenly interests me, I would like to actively scan a code or use digital tools to learn more about it, rather than simply being led along a fixed route. Technologies such as QR-code interaction, AR, and VR can effectively support this more personalized and autonomous way of exploring exhibitions.” |
| Narrative with storytelling or chronological sequence | “At that time, a heritage bearer guided us through the visit. As we moved through a small exhibition space, he explained both the historical context and the works very clearly. He also wove in the broader historical background together with aspects of his own family’s experience, which made the whole process feel vivid and left a strong impression on me.” |
| Digital representation of exhibition content | “I think museums could incorporate AI-generated videos or other forms of digital historical interpretation, as these approaches may be more engaging for visitors. Compared with simply reading text panels, many people are more willing to learn about the history and stories behind the exhibits through visual or interactive formats.” |
| Acquisition of new knowledge and insights | “I think gaining new knowledge is actually one of the most important reasons why I visit museums. Compared with simply checking in or taking photos, I pay more attention to experiences that allow me to immerse myself in the exhibition while learning at the same time.” |
| Comfortable and hygienic interactive installations | “I have experienced VR headsets in some museums, including the Shanghai Museum. However, they sometimes give me a feeling of being unclean or unhygienic, which can affect my willingness to continue using these interactive devices.” |
| Sufficient interactive installations | “In some museums, the number of interactive installations is insufficient. For example, when there is only one interactive screen, each visitor can only engage with it for a very limited amount of time. Usually, only one person can operate it directly, with perhaps one or two others standing nearby, while the remaining visitors can only watch from behind. This kind of experience is actually not very satisfying.” |
| Stable and responsive interactive equipment | “Some interactive devices perform poorly in terms of connection stability, recognition accuracy, and audio feedback. Ideally, visitors would expect the system to quickly recognize their presence and automatically play the related content when they approach a specific location. However, in practice, the devices often take a long time to respond or recognize users, and this delay can become quite frustrating during the visit.” |
| Diverse and entertaining modes of interaction | “I think historical events such as the Crossing-the-Yangtze Campaign should be remembered and understood by more young people and younger generations. Therefore, museums could incorporate more interactive experiences that appeal to young visitors or children, using more engaging approaches to present these historical narratives.” |
| Coherence between interactive modes and exhibition content | “I think it would be highly appealing to incorporate technologies such as artificial intelligence into interactive design. For example, if visitors could stand in front of an exhibit and use certain gestures to interact with the patterns or textures within the exhibition, combined with sound and lighting effects, it would create a strong sense of artistry. The key, however, is that these forms of interaction need to remain consistent with the exhibition content itself, rather than functioning merely as displays of technology.” |
| Intuitive and low-barrier interactive experience | “There was a large vertical screen installation at the site. When visitors walked past it, the system automatically recognized their faces, placed them into a specific visual frame, and generated a photo that could be printed for free. I think this kind of interaction works quite well because it has almost no barrier to participation and does not require any additional cost, while still offering a strong sense of fun and engagement.” |
| Multi-sensory and embodied immersive interaction | “…I think museums could incorporate more sensory elements into their design. For example, in connection with the exhibition content, they could introduce scents or other forms of sensory stimulation. This would make the entire visit feel more immersive and more engaging.” |
| A variety of engaging hands-on activities activities | “I think this type of museum could organize more participatory activities. Since beer itself has a strong social nature, the museum could combine exhibitions with events such as beer festivals or themed parties. In this way, even visitors who are not initially interested in beer culture may become more willing to participate and learn about it.” |
| Personalized and customized products or services | “Some intangible cultural heritage experiences are particularly interesting. For example, with traditional Suzhou-style fans, visitors can participate in making or decorating them themselves. In this way, the final product is no longer just an ordinary souvenir, but something that carries a personal connection because it reflects the visitor’s own participation and identity, making it more meaningful to keep.” |
| Approachable and friendly staff interaction | “Some museums organize live NPC-style interactive activities, which I find particularly appealing because they allow visitors to genuinely participate in the experience rather than simply view exhibitions. Small activities such as pitch-pot or poetry games, combined with souvenirs like fridge magnets, can make the overall experience feel more engaging and enjoyable.” |
| Emotional resonance and memory evocation | “Even after buying souvenirs, seeing them occasionally still reminds me of the place I visited. However, compared with simply bringing objects home, I feel that the emotions experienced during the visit itself leave a deeper impression. Ordinary merchandise or thematic lectures may feel less engaging for the general public, while experiences that create emotional resonance and interaction are often more memorable.” |
| Establishing a tangible or emotional connection with the museum | “I think that when visitors personally make something or leave behind an object connected to their own participation, it becomes easier to establish a sense of connection with the museum. For example, after creating something themselves, visitors may feel a sense of ownership and satisfaction, and may even want to return to make another one as a gift for someone else. To some extent, this kind of interaction itself becomes an attraction—whether it is related to memories, real-time experiences, or interactions between people—and encourages visitors to revisit the museum.” |
| Availability of souvenirs or commemorative booklets | “I visited the museum after seeing recommendations on Xiaohongshu. Although an admission ticket was required, it included free beer and some snacks. Visitors could also receive museum-related souvenirs by participating in on-site games or interactive activities. I think this kind of arrangement is quite appealing and makes the overall visiting experience feel more complete.” |
| Theme-related cultural and creative products | “I think some museums do a really good job with their cultural and creative products. Nowadays, many people may not engage deeply with a place at first, but interesting souvenirs or small objects can still attract them to visit. Personally, I prefer cultural products that reflect local characteristics and convey a more authentic cultural atmosphere, especially DIY experiences that allow visitors to participate in the making process, as these tend to feel more engaging.” |
| Check-in practices and trend participation | “ I think large-scale installations with a strong visual impact are particularly appealing—for example, something like an oversized beer can would feel quite interesting. People would naturally take photos of one another, and the resulting images would have a strong sense of atmosphere, making them especially suitable for sharing on social media.” |
| Leisure destination for friends and families | “I think this kind of museum experience is quite engaging. On the one hand, it leaves a stronger impression; on the other, it can also become something to talk about with friends afterwards. If I had the time, I would still be willing to go again, especially when the experience includes activities that can be participated in and completed together with friends, as that makes it even more enjoyable.” |
